# Supplementary material for: A perylene diimide zwitterionic polymer for photoacoustic imaging guided photothermal/photodynamic synergistic therapy with single near-infrared irradiation
Source: Royal Society of Chemistry journal article supplement (doi:10.1039/c8tb00845k), 2018-01-01
Supplement: c8tb00845k1.pdf [file c8tb00845k1.pdf]

# Perylene Diimide Zwitterionic Polymer for Photoacoustic Imaging Guided Photothermal/Photodynamic Synergetic Therapy with Single Near-Infrared

Pengfei Sun,<sup>a†</sup> Xiaoxiao Wang,<sup>a†</sup> Gaina Wang,<sup>a</sup> Weixing Deng,<sup>a</sup> Qingming Shen,<sup>a</sup>  
Rongcui Jiang,<sup>a</sup> Wenjun Wang,<sup>b</sup> Quli Fan,<sup>\*,a</sup> and Wei Huang,<sup>c</sup>

<sup>a</sup> Key Laboratory for Organic Electronics and Information Displays & Jiangsu Key Laboratory for Biosensors, Institute of Advanced Materials (IAM), Jiangsu National Synergetic Innovation Center for Advanced Materials (SICAM), Nanjing University of Posts & Telecommunications, 9 Wenyuan Road, Nanjing 210023, China.

<sup>b</sup> Key Lab of Optical Communication Science and Technology of Shandong Province & School of Physics Science and Information Engineering, Liaocheng University, Liaocheng 252059, China.

<sup>c</sup> Shaanxi Institute of Flexible Electronics (SIFE), Northwestern Polytechnical University (NPU), 127 West Youyi Road, Xi'an 710072, Shaanxi, China.

<sup>†</sup> These authors contributed equally to this work.

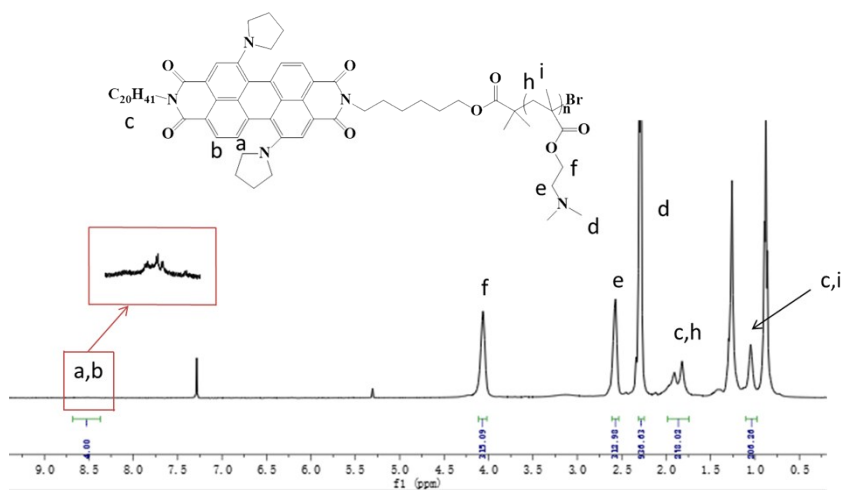

**Figure S1.**  $^1\text{H-NMR}$  spectra of PDMAEMA-PDI in  $\text{CDCl}_3$ .

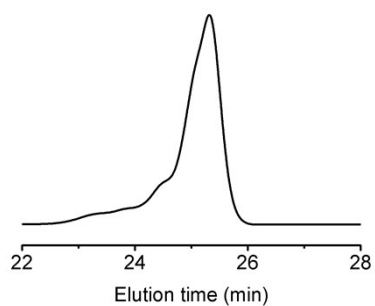

**Figure S2.** The GPC curve of PDMAEMA-PDI.

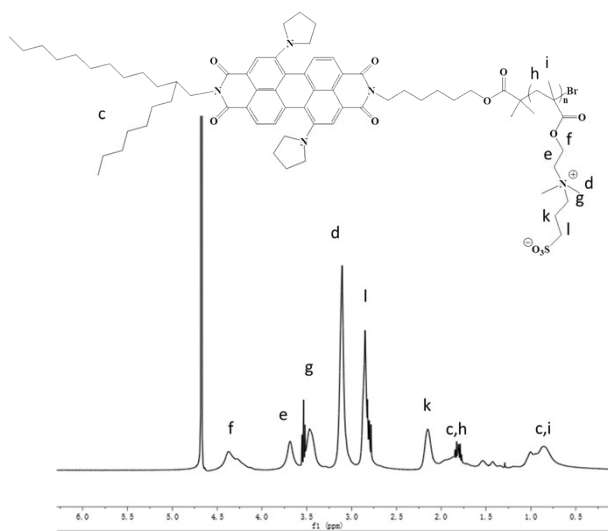

**Figure S3.**  $^1\text{H-NMR}$  spectra of PDS-PDI in  $\text{D}_2\text{O}$ .

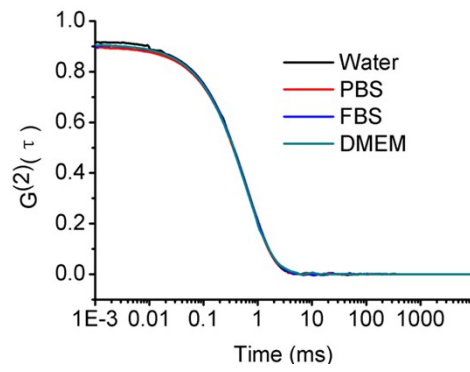

**Figure S4.** Auto correlation function obtained by DLS analysis ( $\theta = 90^\circ$ ) of PDS-PDI in different solvent (Water, PBS, FBS, DMEM).

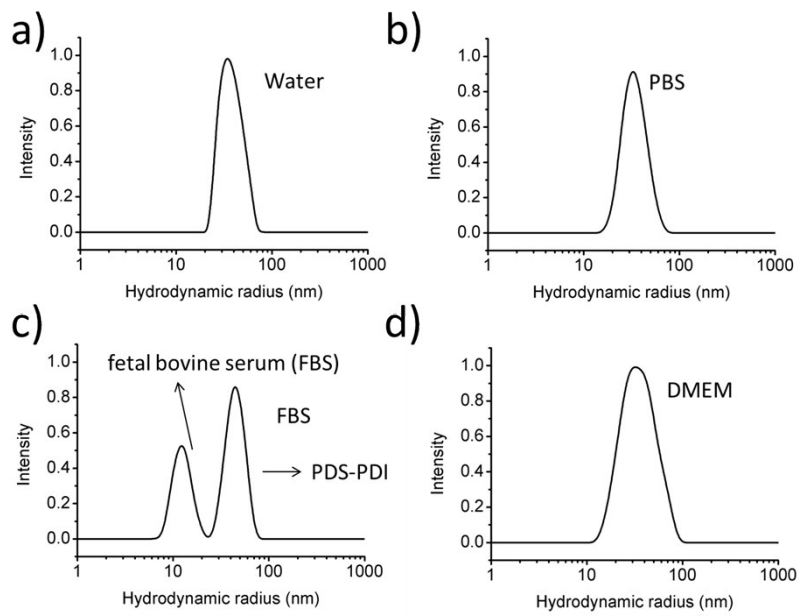

**Figure S5.** The hydrodynamic radius ( $\langle R_h \rangle$ ) of PDS-PDI in different solvent. a) Water, b) PBS, c) FBS, d) DMEM.

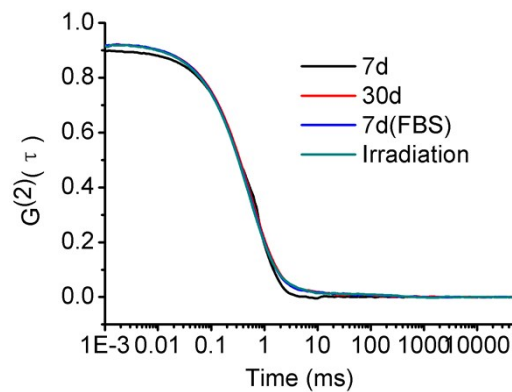

**Figure S6.** Auto correlation function obtained by DLS analysis ( $\theta = 90^\circ$ ) of PDS-PDI by different treatment (after 7 d, 30 d in water, after 7 d in FBS, after irradiation for 30 min (660 nm,  $1.0 \text{ W cm}^{-2}$ )).

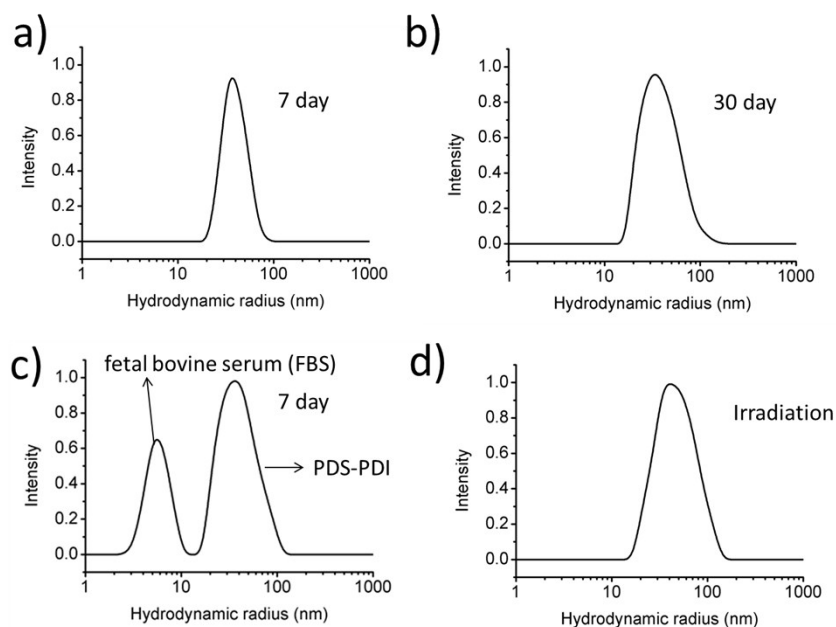

**Figure S7.** a) 7 days, b) 30 days, the hydrodynamic radius ( $\langle R_h \rangle$ ) of PDS-PDI in water. c)  $\langle R_h \rangle$  of PDS-PDI in FBS after 7 days. d)  $\langle R_h \rangle$  of PDS-PDI aqueous solution after irradiation for 30 min (660nm,  $1.0 \text{ W cm}^{-2}$ ).

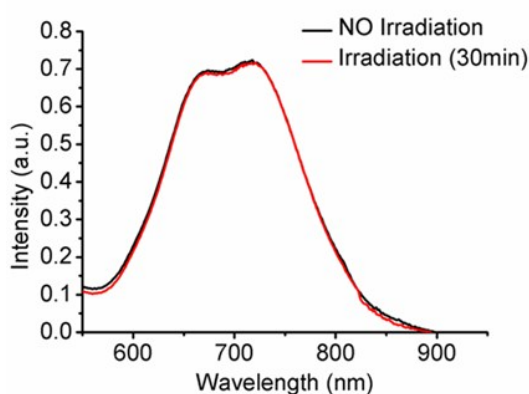

**Figure S8.** UV-vis-NIR spectra of PDS-PDI in water with laser irradiation for 30 min (660 nm laser with a power intensity of  $1.0 \text{ W cm}^{-2}$ ).

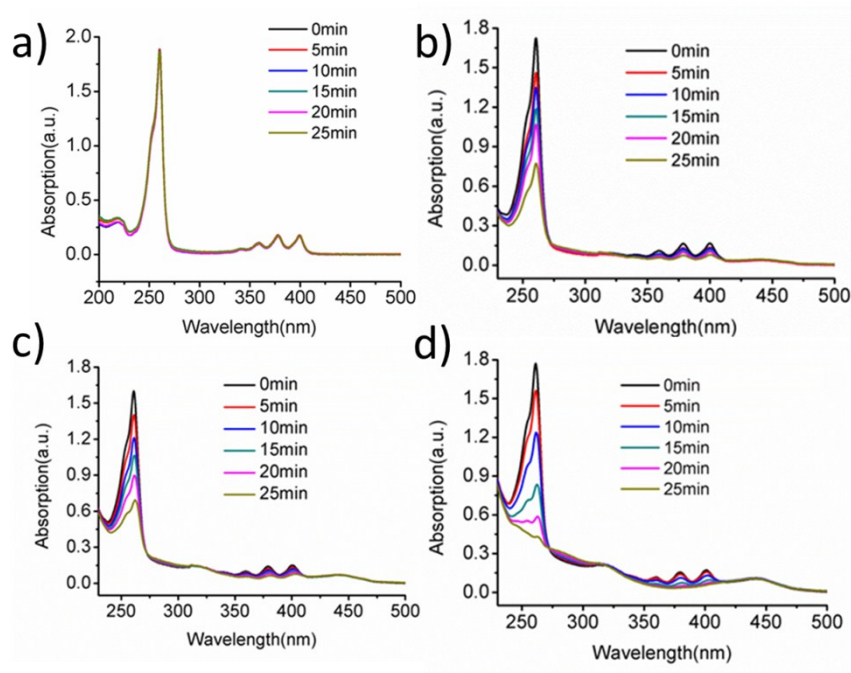

**Figure S9.** a) Absorbance of ADMA after photodecomposition by ROS generation upon laser irradiation without PDS-PDI. b)  $0.0625 \text{ mg mL}^{-1}$ , c)  $0.125 \text{ mg mL}^{-1}$ , d)  $0.5 \text{ mg mL}^{-1}$ , absorbance of ADMA after photodecomposition by ROS generation upon laser irradiation with PDS-PDI.

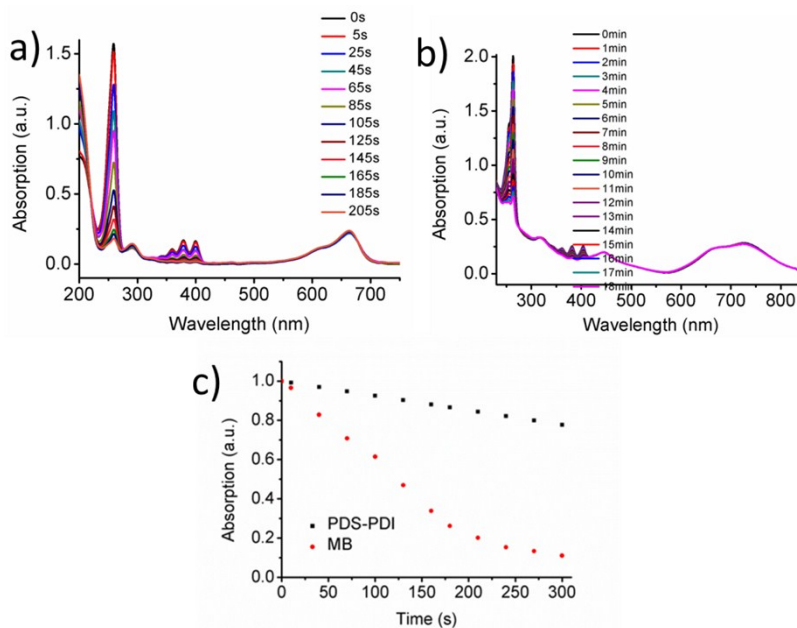

**Figure S10.** The singlet oxygen production efficiency of PDS-PDI aqueous solution.

a) Absorbance of ADMA after photodecomposition by ROS generation upon laser

irradiation with MB (660 nm, 0.5 W cm<sup>-2</sup>). b) With PDS-PDI (660 nm, 0.5 W cm<sup>-2</sup>). c)

Time-dependent absorption of ADMA at 264 nm under laser irradiation.

Singlet oxygen quantum yields were calculated according to the equation:

$$\Phi_{\Delta}(PS) = \Phi_{\Delta}(MB) \times \frac{m(PS)}{m(MB)} \times \frac{F(MB)}{F(PS)} \quad (1)$$

where PS and MB designate photosensitizer and methylene blue respectively.  $\Phi_{\Delta}(MB)$

is the singlet oxygen quantum yield of MB free in water given as 0.52.  $m$  is the slope

of difference in change in absorbance of ADMA at absorbance maxima with the

irradiation time.  $F$  is the absorption correction factor, which is given as  $F = 1 - 10^{-OD}$ .

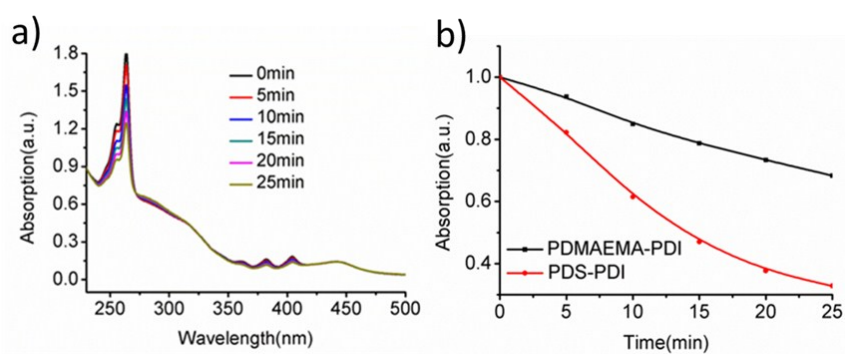

**Figure S11.** a) Absorbance of ADMA after photodecomposition by ROS generation upon laser irradiation with PDMAEMA-PDI. b) Time-dependent absorption of ADMA at 264 nm under laser irradiation (The same concentration of PDMAEMA-PDI and PDS-PDI).

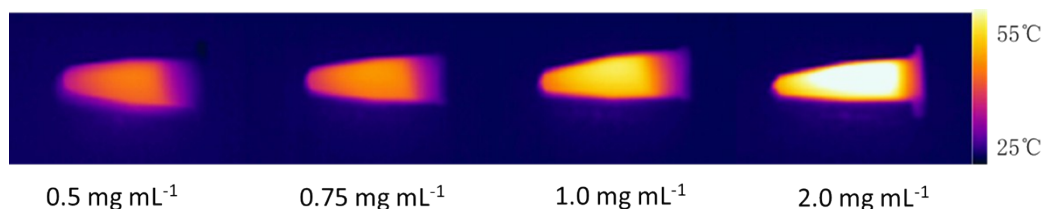

**Figure S12.** The thermal images of polymer PDS-PDI aqueous solution with different concentrations.

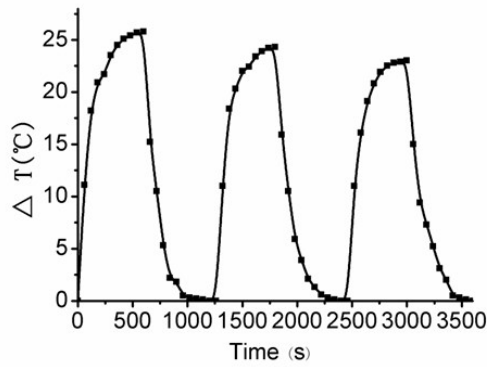

**Figure S13.** The thermal cycling of polymer PDS-PDI aqueous solution (660 nm, 0.5 W cm<sup>-2</sup>).

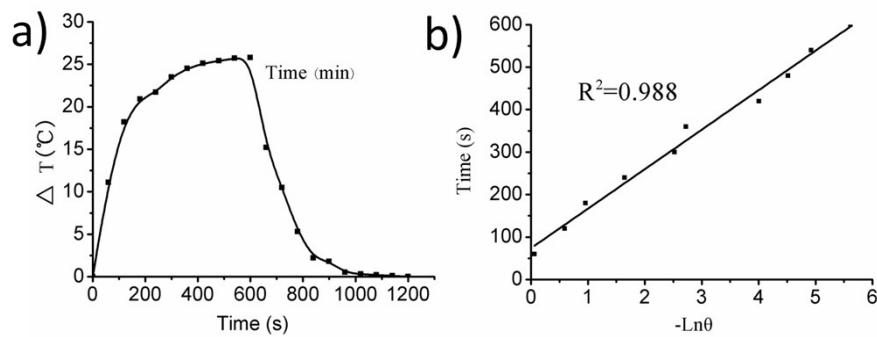

**Figure S14.** The photothermal conversion efficiency of polymer PDS-PDI aqueous solution. a) The photothermal response of the aqueous solution of PDS-PDI (0.5 mg mL<sup>-1</sup>) for 600 s with a NIR laser (660 nm, 0.5 W cm<sup>-2</sup>) and then the laser was shut off. b) Linear time data versus  $-\ln \theta$  obtained from the cooling period of Figure S13a.

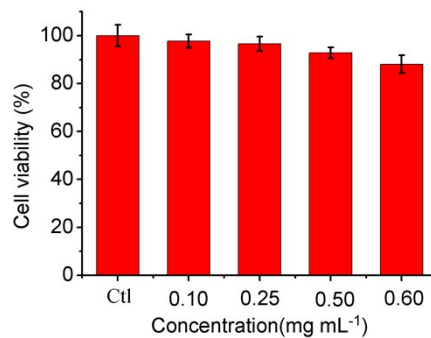

**Figure S15.** Cell viabilities of MDA-MB-231 cells incubated for 24 h with at different concentrations polymer PDS-PDI (0-0.6 mg mL<sup>-1</sup>) without laser irradiation.

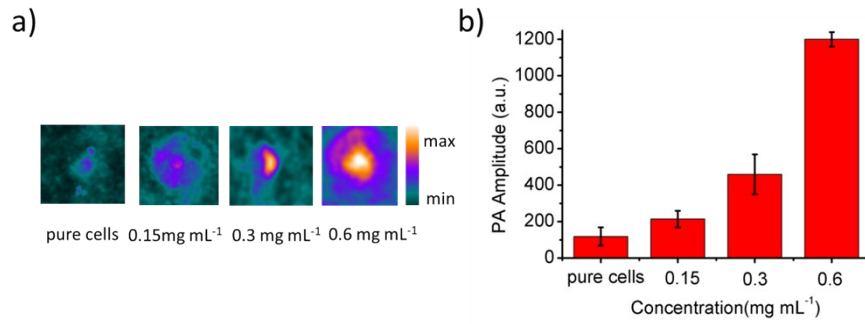

**Figure S16.** (a) The PA imaging and (b) PA intensity of pure MDA-MB-231 cells and MDA-MB-231 cells after 4 h incubated with different concentrations PDS-PDI.

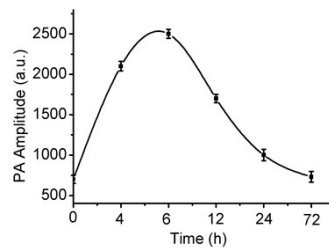

**Figure S17.** Real-time monitoring of the PA intensity changes of blood post injection of PDS-PDI (2 mg mL<sup>-1</sup>, 100 uL).

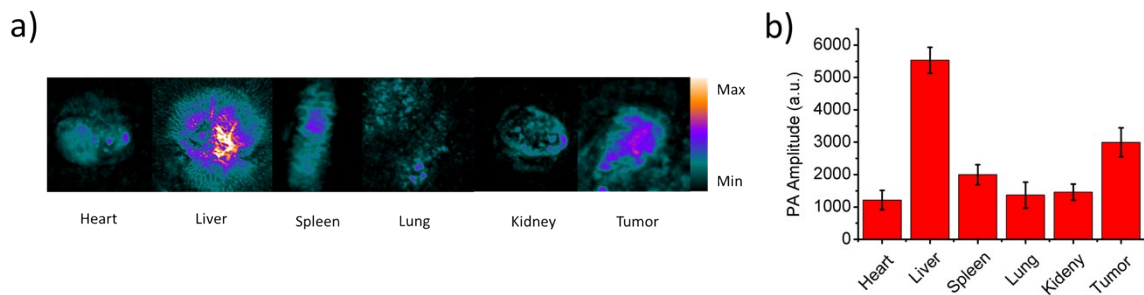

**Figure S18.** Biodistribution analysis of PDS-PDI by PA imaging. a) *Ex vivo* PA imaging of main organs after 24 h injection of PDS-PDI. b) Quantification of PA signal intensity of main organs after 24 h injection of PDS-PDI.



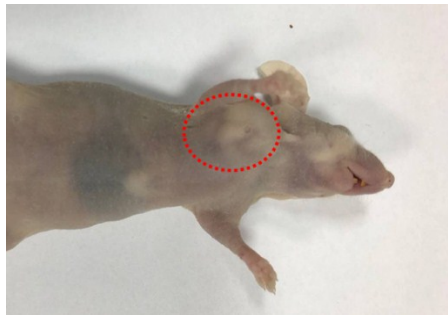

**Figure S19.** A bright field image of MDA-MB-231 tumor-bearing mice for *in vivo* photothermal test.

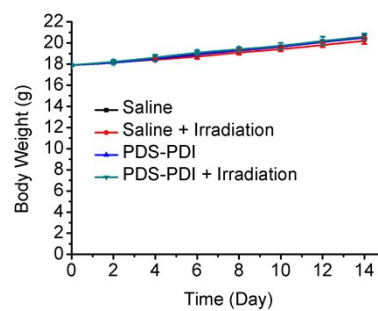

**Figure S20.** Body weight curves of MDA-MB-231 tumor-bearing mice for four treatment groups.

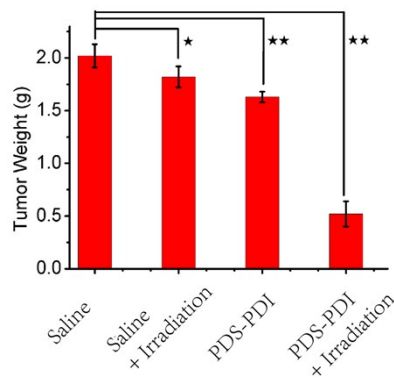

**Figure S21.** MDA-MB-231 tumor weight, sacrificed mice from the four treatment groups.

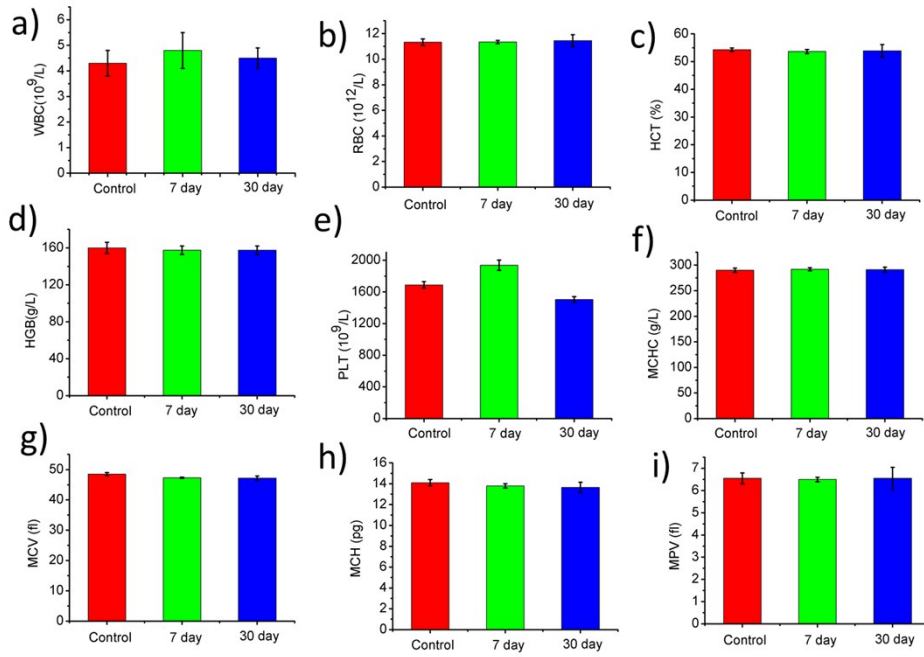

**Figure S22.** Blood routines of mice examination were measured after the treatment with polymer PDS-PDI ( $2 \text{ mg mL}^{-1}$ ,  $100 \text{ uL}$ ) during 30 day.
